# Supplementary material
Source: PubMed Central journal article supplement (PMC2789608)

# Supplementary Figure 1

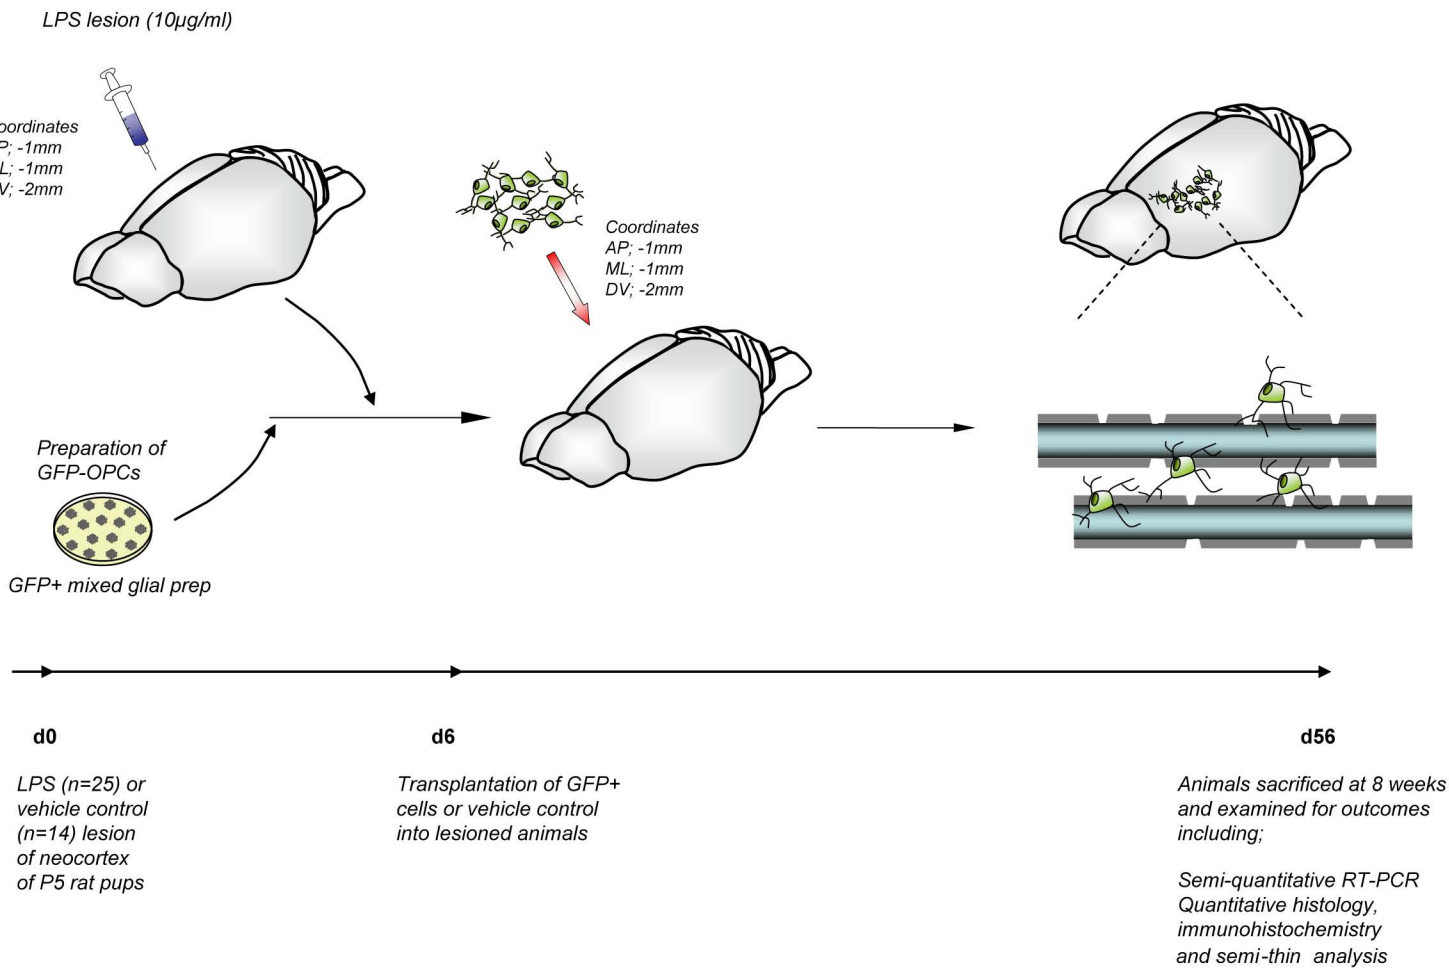

Supplement: ajpath.2009.090051_1.pdf [file ajpath.2009.090051_1.pdf]

# Supplementary Figure 2

Saline control

LPS lesion

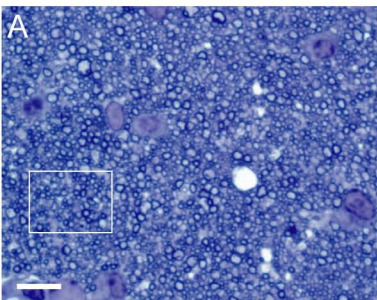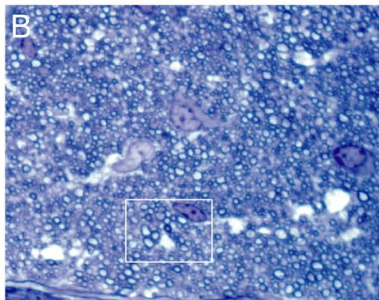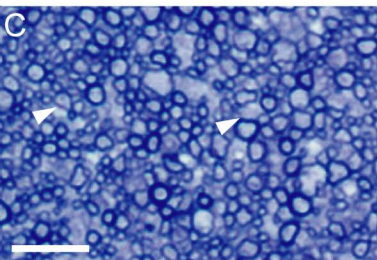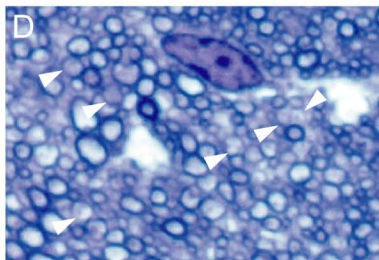

**E**

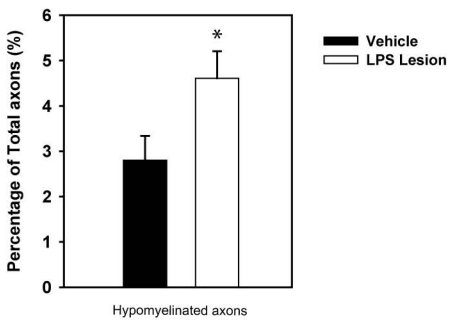

Supplement: ajpath.2009.090051_2.pdf [file ajpath.2009.090051_2.pdf]

# Supplementary Figure 3

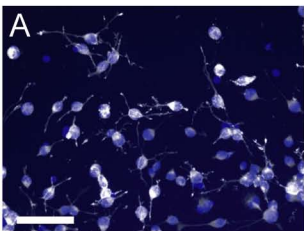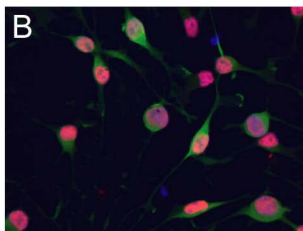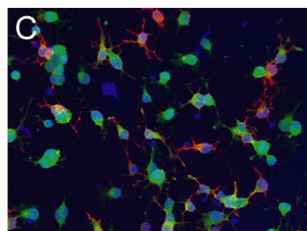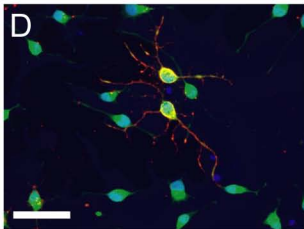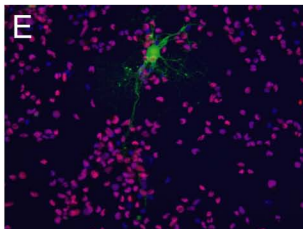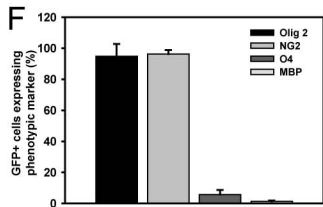

Supplement: ajpath.2009.090051_3.pdf [file ajpath.2009.090051_3.pdf]

# Supplementary Figure 4

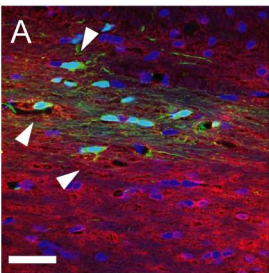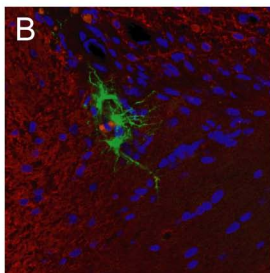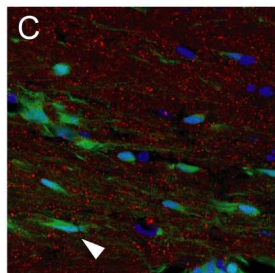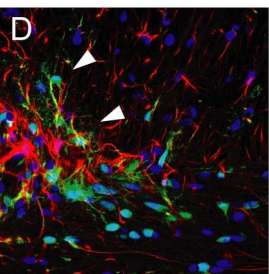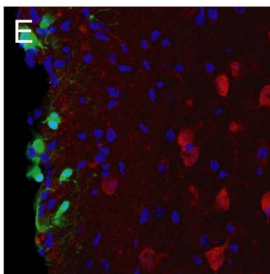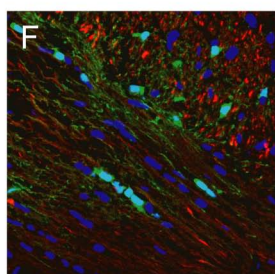

Supplement: ajpath.2009.090051_4.pdf [file ajpath.2009.090051_4.pdf]

# Supplementary Figure 5

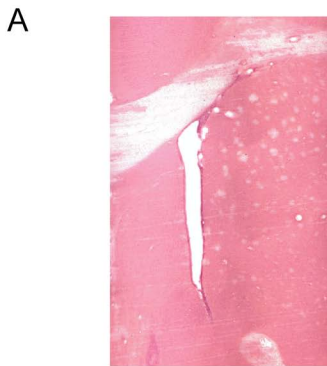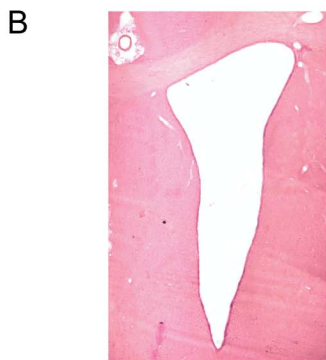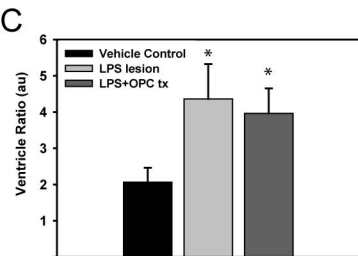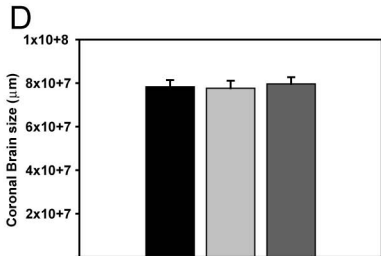

Supplement: ajpath.2009.090051_5.pdf [file ajpath.2009.090051_5.pdf]
